# Supplementary material for: Association between Dietary Patterns during Pregnancy and Children’s Neurodevelopment: A Birth Cohort Study
Source: MDPI journal article supplement (doi:10.3390/nu16101530), 2024-05-19
Supplement: s1 [file s1]

**Supplementary Figure S1** Directed acyclic graph to show the association between dietary pattern during pregnancy and children's neurodevelopment

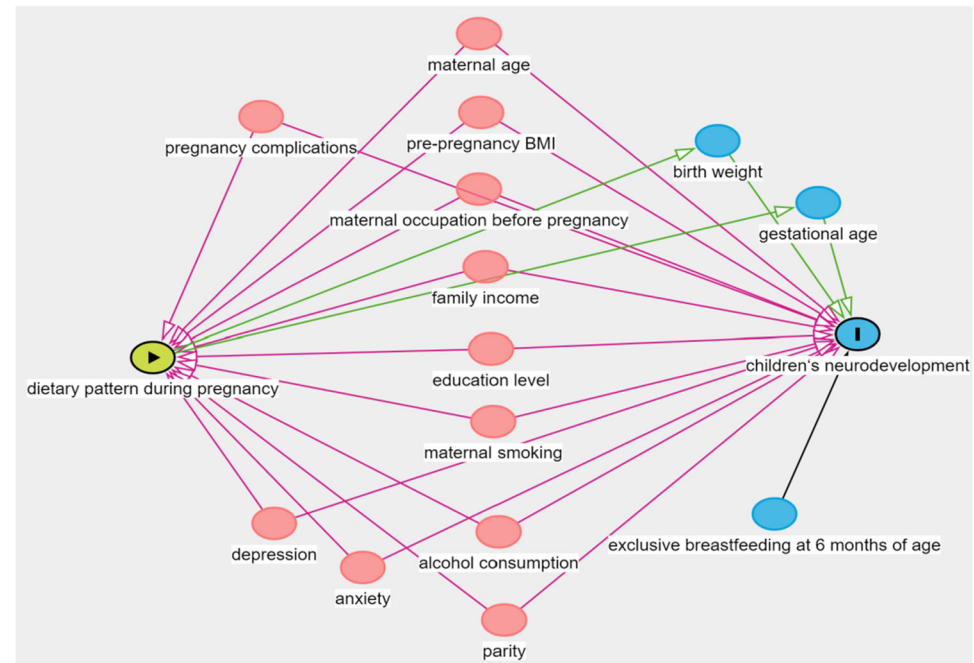

**Supplementary Table S1** Dietary patterns identified by PCA and factor loadings of food groups/items\* for women in three trimesters of pregnancy (n=1,423).

| Food items            | Maternal dietary pattern        |          |                          |                                 |           |          |                                 |                                |          |   |
|-----------------------|---------------------------------|----------|--------------------------|---------------------------------|-----------|----------|---------------------------------|--------------------------------|----------|---|
|                       | The first trimester             |          |                          | The second trimester            |           |          | The third trimester             |                                |          |   |
|                       | Protein and micronutrient -rich | Low-iron | Pasta as the staple food | Protein and micronutrient -rich | Rich-iron | Low-iron | Protein and micronutrient -rich | and Tubers; fruits; baked food | Low-iron |   |
| Rice                  | -                               | -        | -0.625                   | -                               | -         | -        | -                               | -                              | -        | - |
| Steam cooked pasta    | -                               | -        | 0.587                    | -                               | -         | -        | -                               | -                              | -        | - |
| Coarse cereals        | 0.358                           | -        | -                        | 0.387                           | -0.350    | -        | 0.300                           | -0.457                         | -        | - |
| Tubers                | 0.337                           | -        | -                        | 0.325                           | -         | 0.387    | 0.316                           | 0.494                          | -        | - |
| Fried dough foods     | 0.355                           | -0.387   | -                        | -                               | 0.442     | -        | -                               | -                              | -        | - |
| Soybean-food          | 0.475                           | -        | -                        | 0.471                           | -         | -        | 0.474                           | -                              | -        | - |
| Soymilk               | 0.338                           | -        | -                        | -                               | -         | -        | -                               | -                              | -        | - |
| Fungal and algal food | 0.508                           | -        | -                        | 0.487                           | -         | -        | 0.488                           | -                              | -        | - |
| Fresh vegetables      | -                               | -        | -0.333                   | -                               | -         | -        | -                               | -                              | 0.330    | - |
| Fresh fruits          | -                               | 0.367    | -                        | -                               | -         | 0.637    | -                               | 0.673                          | -        | - |
| Citrus fruits         | -                               | -        | -                        | 0.353                           | -         | 0.421    | 0.319                           | 0.640                          | -        | - |
| Dry fruit             | 0.442                           | -        | -                        | 0.388                           | -         | -        | 0.408                           | -                              | -        | - |
| Nut                   | 0.364                           | 0.322    | -                        | 0.473                           | -         | -        | 0.499                           | -                              | -        | - |
| Animal offal          | 0.529                           | -        | -                        | 0.421                           | -         | -0.300   | 0.459                           | -                              | -        | - |
| Animal blood          | 0.548                           | -0.381   | -                        | 0.393                           | 0.415     | -0.319   | 0.410                           | -                              | -0.421   | - |
| Shrimp                | 0.493                           | -        | -                        | 0.391                           | -         | -        | 0.404                           | -                              | -        | - |
| Fish                  | 0.452                           | -        | -                        | 0.409                           | 0.541     | -        | 0.392                           | -                              | -        | - |
| Mollusk               | 0.553                           | -0.493   | -                        | 0.428                           | 0.562     | -        | 0.349                           | -                              | -0.543   | - |
| Shellfish             | 0.528                           | -0.549   | -                        | 0.325                           | -0.392    | -        | 0.341                           | -                              | -0.590   | - |
| Eggs                  | 0.316                           | 0.354    | -                        | 0.342                           | -         | -        | 0.366                           | -                              | 0.302    | - |
| Dairy                 | 0.307                           | -        | -                        | 0.323                           | -         | -        | 0.325                           | -                              | -        | - |
| Baked food            | -                               | -        | -                        | -                               | -         | 0.311    | -                               | 0.461                          | -        | - |
| Meat                  | -                               | -        | -                        | 0.375                           | -         | -        | -                               | -                              | -        | - |

Factor loadings indicated food group contribution to each dietary pattern

**Supplementary Table S2** Sensitivity analyses of the association between maternal dietary pattern scores during pregnancy and 36-month-old children's neurodevelopment [ $\beta$  (95%CI)]

| Maternal dietary pattern       |        | Total ASQ Score                      | Communication                           | Gross motor                          | Fine motor               | Problem-solving                         | Personal-social          |
|--------------------------------|--------|--------------------------------------|-----------------------------------------|--------------------------------------|--------------------------|-----------------------------------------|--------------------------|
| First trimester                |        |                                      |                                         |                                      |                          |                                         |                          |
| Protein and micronutrient-rich | Model3 | <b>0.052</b><br><b>(0.002,0.101)</b> | 0.049<br>(-0.001,0.099)                 | <b>0.053</b><br><b>(0.002,0.104)</b> | 0.010<br>(-0.035,0.056)  | 0.049<br>(-0.001,0.098)                 | 0.040<br>(-0.009,0.089)  |
|                                | Model4 | <b>0.057</b><br><b>(0.009,0.106)</b> | <b>0.052</b><br><b>(0.004,0.101)</b>    | <b>0.058</b><br><b>(0.007,0.109)</b> | 0.017<br>(-0.028,0.062)  | <b>0.056</b><br><b>(0.008,0.105)</b>    | 0.037<br>(-0.011,0.085)  |
|                                | Model5 | <b>0.053</b><br><b>(0.006,0.101)</b> | <b>0.053</b><br><b>(0.006,0.100)</b>    | <b>0.055</b><br><b>(0.007,0.104)</b> | 0.010<br>(-0.034,0.054)  | <b>0.052</b><br><b>(0.005,0.099)</b>    | 0.039<br>(-0.008,0.085)  |
| Low-iron                       | Model3 | -0.025<br>(-0.092,0.042)             | -0.047<br>(-0.115,0.020)                | -0.028<br>(-0.098,0.041)             | 0.020<br>(-0.043,0.082)  | -0.054<br>(-0.121,0.013)                | -0.009<br>(-0.075,0.057) |
|                                | Model4 | -0.031<br>(-0.098,0.035)             | -0.054<br>(-0.120,0.012)                | -0.029<br>(-0.098,0.040)             | 0.017<br>(-0.045,0.078)  | -0.066<br>(-0.132,0.001)                | -0.008<br>(-0.074,0.057) |
|                                | Model5 | -0.039<br>(-0.102,0.024)             | -0.059<br>(-0.123,0.004)                | -0.032<br>(-0.098,0.034)             | 0.015<br>(-0.044,0.074)  | <b>-0.072</b><br><b>(-0.136,-0.009)</b> | -0.019<br>(-0.082,0.043) |
| Pasta as the staple food       | Model3 | -0.030<br>(-0.102,0.043)             | -0.071<br>(-0.144,0.001)                | <b>0.080</b><br><b>(0.005,0.154)</b> | -0.034<br>(-0.101,0.034) | -0.010<br>(-0.083,0.063)                | -0.044<br>(-0.115,0.028) |
|                                | Model4 | -0.032<br>(-0.103,0.040)             | -0.069<br>(-0.041,0.002)                | 0.073<br>(-0.001,0.148)              | -0.035<br>(-0.101,0.031) | -0.011<br>(-0.083,0.060)                | -0.043<br>(-0.113,0.028) |
|                                | Model5 | -0.038<br>(-0.105,0.030)             | <b>-0.077</b><br><b>(-0.145,-0.010)</b> | 0.058<br>(-0.012,0.128)              | -0.028<br>(-0.091,0.035) | -0.026<br>(-0.093,0.042)                | -0.044<br>(-0.111,0.023) |
| Second trimester               |        |                                      |                                         |                                      |                          |                                         |                          |
| Protein and micronutrient-     | Model3 | 0.040                                | 0.036                                   | <b>0.062</b>                         | 0.012                    | <b>0.053</b>                            | -0.001                   |

|                                |        |                        |                      |                        |                |                      |                |
|--------------------------------|--------|------------------------|----------------------|------------------------|----------------|----------------------|----------------|
| rich                           | Model4 | (-0.013,0.093)         | (-0.017,0.090)       | <b>(0.007,0.116)</b>   | (-0.037,0.060) | <b>(0.001,0.106)</b> | (-0.052,0.052) |
|                                |        | 0.047                  | 0.046                | <b>0.063</b>           | 0.014          | <b>0.057</b>         | 0.010          |
|                                |        | (-0.005,0.099)         | (-0.006,0.098)       | <b>(0.009,0.117)</b>   | (-0.034,0.062) | <b>(0.005,0.110)</b> | (-0.042,0.061) |
|                                | Model5 | <b>0.050</b>           | 0.044                | <b>0.064</b>           | 0.015          | <b>0.060</b>         | 0.015          |
|                                |        | <b>(0.001,0.099)</b>   | (-0.005,0.093)       | <b>(0.013,0.115)</b>   | (-0.031,0.060) | <b>(0.011,0.109)</b> | (-0.033,0.064) |
|                                |        | <b>0.082</b>           | <b>0.091</b>         | 0.055                  | 0.043          | 0.059                | 0.054          |
|                                | Model3 | <b>(0.018,0.146)</b>   | <b>(0.026,0.155)</b> | (-0.012,0.121)         | (-0.016,0.102) | (-0.005,0.123)       | (-0.009,0.117) |
|                                |        | <b>0.088</b>           | <b>0.100</b>         | 0.057                  | 0.049          | <b>0.072</b>         | 0.044          |
|                                |        | <b>(0.025,0.151)</b>   | <b>(0.036,0.163)</b> | (-0.009,0.123)         | (-0.009,0.107) | <b>(0.009,0.136)</b> | (-0.018,0.107) |
| Rich-iron                      | Model4 | <b>0.081</b>           | <b>0.090</b>         | 0.060                  | 0.039          | <b>0.074</b>         | 0.039          |
|                                |        | <b>(0.021,0.140)</b>   | <b>(0.030,0.150)</b> | (-0.002,0.122)         | (-0.017,0.094) | <b>(0.014,0.134)</b> | (-0.020,0.099) |
|                                |        | <b>-0.074</b>          | -0.051               | <b>-0.099</b>          | -0.045         | -0.032               | -0.046         |
|                                | Model3 | <b>(-0.146,-0.001)</b> | (-0.125,0.022)       | <b>(-0.173,-0.024)</b> | (-0.112,0.022) | (-0.105,0.041)       | (-0.117,0.025) |
|                                |        | -0.071                 | -0.050               | <b>-0.102</b>          | -0.044         | -0.025               | -0.044         |
|                                |        | (-0.144,0.002)         | (-0.124,0.023)       | <b>(-0.178,-0.026)</b> | (-0.111,0.023) | (-0.098,0.049)       | (-0.116,0.028) |
| Low-iron                       | Model4 | -0.066                 | -0.042               | <b>-0.095</b>          | -0.046         | -0.020               | -0.039         |
|                                |        | (-0.133,0.002)         | (-0.110,0.027)       | <b>(-0.165,-0.025)</b> | (-0.110,0.017) | (-0.088,0.049)       | (-0.106,0.029) |
|                                |        |                        |                      |                        |                |                      |                |
| Third trimester                |        |                        |                      |                        |                |                      |                |
|                                | Model3 | 0.035                  | 0.037                | <b>0.066</b>           | 0.001          | 0.044                | 0.006          |
|                                |        | (-0.017,0.088)         | (-0.015,0.090)       | <b>(0.013,0.120)</b>   | (-0.048,0.048) | (-0.009,0.096)       | (-0.046,0.057) |
|                                |        | 0.036                  | 0.042                | <b>0.059</b>           | -0.001         | 0.044                | 0.008          |
| Protein and micronutrient-rich | Model4 | (-0.015,0.087)         | (-0.010,0.093)       | <b>(0.006,0.112)</b>   | (-0.047,0.047) | (-0.007,0.095)       | (-0.042,0.058) |
|                                |        | 0.036                  | 0.041                | <b>0.061</b>           | 0.001          | 0.037                | 0.011          |
|                                |        | (-0.013,0.084)         | (-0.008,0.090)       | <b>(0.011,0.112)</b>   | (-0.045,0.046) | (-0.012,0.086)       | (-0.037,0.060) |
|                                | Model5 | 0.011                  | 0.018                | -0.012                 | -0.004         | 0.032                | 0.011          |
|                                |        | (-0.056,0.079)         | (-0.050,0.085)       | (-0.082,0.057)         | (-0.066,0.058) | (-0.035,0.099)       | (-0.055,0.076) |

|          |        |                                         |                                         |                                         |                          |                          |                          |
|----------|--------|-----------------------------------------|-----------------------------------------|-----------------------------------------|--------------------------|--------------------------|--------------------------|
| Low-iron | Model4 | 0.025<br>(-0.041,0.091)                 | 0.277<br>(-0.039,0.094)                 | -0.007<br>(-0.076,0.063)                | 0.012<br>(-0.049,0.073)  | 0.050<br>(-0.017,0.116)  | 0.006<br>(-0.059,0.071)  |
|          | Model5 | 0.012<br>(-0.052,0.075)                 | 0.016<br>(-0.048,0.080)                 | -0.020<br>(-0.086,0.047)                | 0.005<br>(-0.054,0.064)  | 0.040<br>(-0.023,0.104)  | -0.002<br>(-0.065,0.060) |
|          | Model3 | <b>-0.077</b><br><b>(-0.146,-0.008)</b> | <b>-0.078</b><br><b>(-0.147,-0.008)</b> | <b>-0.075</b><br><b>(-0.146,-0.004)</b> | -0.058<br>(-0.121,0.006) | -0.041<br>(-0.110,0.028) | -0.030<br>(-0.097,0.038) |
|          | Model4 | <b>-0.075</b><br><b>(-0.142,-0.007)</b> | <b>-0.075</b><br><b>(-0.143,-0.007)</b> | <b>-0.077</b><br><b>(-0.148,-0.007)</b> | -0.059<br>(-0.122,0.003) | -0.039<br>(-0.107,0.029) | -0.021<br>(-0.088,0.045) |
|          | Model5 | -0.054<br>(-0.119,0.010)                | <b>-0.068</b><br><b>(-0.133,-0.003)</b> | <b>-0.065</b><br><b>(-0.133,-0.002)</b> | -0.042<br>(-0.102,0.018) | -0.026<br>(-0.091,0.040) | -0.003<br>(-0.067,0.061) |

Bolding indicated p-values < 0.05;

Model3 Further adjusted for birth weight Z scores;

Model4 Further adjusted exclusive breastfeeding at 6 months of age;

Model5 Further adjusted infants' complementary food within 6 months of age.

**Supplementary Table S3** Sensitivity analyses of the association between different trajectory groups of dietary pattern during pregnancy and 36-month-old children's neurodevelopment [ $\beta$  (95%CI)]

| Maternal dietary pattern trajectories | Total ASQ score                      | Communication            | Gross motor                          | Fine motor               | Problem-solving                      | Personal-social          |
|---------------------------------------|--------------------------------------|--------------------------|--------------------------------------|--------------------------|--------------------------------------|--------------------------|
| Protein and micronutrient-rich        |                                      |                          |                                      |                          |                                      |                          |
| Model3                                | 4.062<br>(-0.910,9.035)              | 0.740<br>(-0.383,1.864)  | <b>1.242</b><br><b>(0.190,2.295)</b> | 0.822<br>(-1.123,2.767)  | 1.298<br>(-0.044,2.641)              | -0.041<br>(-1.547,1.464) |
| Model4                                | 4.515<br>(-0.354,9.384)              | 0.881<br>(-0.214,1.976)  | <b>1.248</b><br><b>(0.207,2.290)</b> | 0.830<br>(-1.071,2.731)  | <b>1.382</b><br><b>(0.063,2.700)</b> | 0.175<br>(-1.310,1.660)  |
| Model5                                | <b>5.134</b><br><b>(0.486,9.783)</b> | 0.941<br>(-0.109,1.991)  | <b>1.279</b><br><b>(0.288,2.271)</b> | 0.998<br>(-0.835,2.831)  | <b>1.496</b><br><b>(0.238,2.753)</b> | 0.421<br>(-1.002,1.843)  |
| Low-iron                              |                                      |                          |                                      |                          |                                      |                          |
| Model3                                | -1.390<br>(-7.345,4.565)             | -0.470<br>(-1.814,0.874) | -0.274<br>(-1.538,0.989)             | -0.660<br>(-2.985,1.666) | -0.128<br>(-1.738,1.481)             | 0.143<br>(-1.657,1.942)  |
| Model4                                | -0.857<br>(-6.679,4.964)             | -0.415<br>(-1.723,0.893) | -0.108<br>(-1.355,1.140)             | -0.638<br>(-2.906,1.630) | -0.074<br>(-1.651,1.504)             | 0.377<br>(-1.394,2.148)  |
| Model5                                | -1.009<br>(-6.653,4.636)             | -0.410<br>(-1.682,0.863) | -0.113<br>(-1.319,1.092)             | -0.852<br>(-3.071,1.368) | 0.116<br>(-1.413,1.644)              | 0.251<br>(-1.472,1.973)  |

Bolding indicated p-values < 0.05;

Model3 Further adjusted for birth weight Z scores;

Model4 Further adjusted exclusive breastfeeding at 6 months of age;

Model5 Further adjusted infants' complementary food within 6 months of age.
